1 Plasmid-encoded H-NS controls extracellular matrix composition in a modern  
2 *Acinetobacter baumannii* urinary isolate

3

4 Saida Benomar<sup>a#</sup>, Gisela Di Venanzio<sup>a</sup>, Mario F. Feldman <sup>a#</sup>

5

6 <sup>a</sup> Department of Molecular Microbiology, Washington University School of Medicine, St  
7 Louis, MO, 63110, USA.

8

9 # Address correspondence to Saida Benomar, [sbenomar@wustl.edu](mailto:sbenomar@wustl.edu), or Mario F. Feldman,  
10 [mariofeldman@wustl.edu](mailto:mariofeldman@wustl.edu)

11

12

13

14 **Running title:** Biofilm regulation in *Acinetobacter baumannii* by H-NS

15

16

17

18

19

20

21

22

23

## 24 **ABSTRACT**

25 *Acinetobacter baumannii* is emerging as a multidrug-resistant (MDR) nosocomial pathogen  
26 of increasing threat to human health worldwide. The recent MDR urinary isolate UPAB1  
27 carries the plasmid pAB5, a member of a family of large conjugative plasmids (LCP). LCP  
28 encode several antibiotic resistance genes and repress the type VI secretion system (T6SS)  
29 to enable their dissemination, employing two TetR transcriptional regulators. Furthermore,  
30 pAB5 controls the expression of additional chromosomally encoded genes, impacting  
31 UPAB1 virulence. Here we show that a pAB5-encoded H-NS transcriptional regulator  
32 represses the synthesis of the exopolysaccharide PNAG and the expression of a previously  
33 uncharacterized three-gene cluster that encodes a protein belonging to the CsgG/HfaB  
34 family. Members of this protein family are involved in amyloid or polysaccharide formation  
35 in other species. Deletion of the CsgG homolog abrogated PNAG production and Cup pili  
36 formation, resulting in a subsequent reduction in biofilm formation. Although this gene  
37 cluster is widely distributed in Gram-negative bacteria, it remains largely uninvestigated. Our  
38 results illustrate the complex cross-talks that take place between plasmids and the  
39 chromosomes of their bacterial host, which in this case can contribute to the pathogenesis  
40 of *Acinetobacter*.

41

## 42 **IMPORTANCE**

43 The opportunistic human pathogen *Acinetobacter baumannii* displays the highest reported  
44 rates of multidrug resistance among Gram-negative pathogens. Many *A. baumannii* strains  
45 carry large conjugative plasmids like pAB5. In recent years, we have witnessed an increase  
46 in knowledge about the regulatory cross-talks between plasmids and bacterial

47 chromosomes. Here we show that pAB5 controls the composition of the bacterial  
48 extracellular matrix, resulting in a drastic reduction in biofilm formation. The association  
49 between biofilm formation, virulence, and antibiotic resistance is well-documented.  
50 Therefore, understanding the factors involved in the regulation of biofilm formation in  
51 *Acinetobacter* has remarkable therapeutic potential.

52

53

54

55

56

57

58

59

60

61

62

63

64

65

## 66 INTRODUCTION

67 *Acinetobacter baumannii* is regarded as a nosocomial pathogen capable of causing multiple  
68 types of infection; however, in the last few years community-acquired infections have  
69 become more common. Importantly, *A. baumannii* is a major threat to global health due to  
70 the increasing prevalence of the multi-drug resistant (MDR) isolates (1,2). Genes encoding  
71 for antibiotic resistance are usually located in chromosomal resistance islands or in plasmids  
72 (3,4). Plasmids are major contributors to horizontal gene transfer (HGT), as they facilitate  
73 the exchange of genetic material between microorganisms, spreading the MDR phenotype  
74 (5-7). For decades, plasmid biology focused on their replication, maintenance, and  
75 mobilization, as well as their contribution to antibiotic resistance and virulence (8). More  
76 recently, genomic and transcriptomic analyses have begun to uncover complex and  
77 dynamic relationships between plasmids and their host chromosome.

78 *A. baumannii* strains harbor different types of plasmids. Regarding MDR, the Large  
79 Conjugative Plasmids (LCPs) family, which are approximately 150-200 Kb, are particularly  
80 worrisome. pAB3, the LCP carried in the lab strain ATCC17978, isolated in 1951 carries  
81 only one cassette conferring resistance to trimethoprim. However, pAB04 or pAB5, LCPs  
82 from recent clinical isolates AB04 and UPAB1, contain 12 and 15 antibiotic resistance  
83 cassettes, respectively. This increase in the number of antibiotic resistance cassettes  
84 illustrates the rapid evolution of these plasmids. LCPs contain three conserved regions: the  
85 MDR region, containing various antibiotic resistance cassettes; a region encoding the T4SS  
86 conjugative pilus, required for plasmid dissemination via conjugation; and the regulatory  
87 region, which contains several transcriptional regulators (9-11). For example, LCPs harbor  
88 two TetR regulators that repress the Type VI secretion system (T6SS) encoded in *A.*

89 *baumannii* chromosome, which allows conjugation and promotes their own dissemination  
90 (10).

91 We have previously shown that besides providing resistance to antibiotics and repressing  
92 T6SS, pAB5 can control the expression of additional chromosomally encoded genes,  
93 impacting UPAB1 virulence (11). The regulatory activity of pAB5 can be observed by plating  
94 cells with or without this plasmid in Congo-red containing plates. The bacteria colonies  
95 carrying pAB5 are much lighter, which reflects a clear reduction in Congo-red binding.  
96 Transcriptomic and proteomic analysis revealed that pAB5 reduced the expression of cell-  
97 surface components, including (Chaperone/Usher Pathway) CUP pili,  $\beta$ -1  $\rightarrow$  6-linked poly-  
98 N-acetyl glucosamine (PNAG), and many additional proteins of unknown functions (11). A  
99 bioinformatic analysis of the pAB5 sequence revealed that this LCP encodes at least six  
100 genes predicted to function as transcriptional regulators. In this work, we explored the cross-  
101 talk between pAB5 and the chromosome of UPAB1, and identified the transcriptional  
102 regulator involved in regulation of PNAG synthesis. Furthermore, our analysis revealed a  
103 novel uncharacterized gene cluster regulated by pAB5, evolutionarily related to curli  
104 formation, and whose disruption has a dramatic effect on the surface composition of UPAB1.

105

## 106 **RESULTS**

107 **The transcriptional regulator H-NS, from pAB5, controls UPAB1 phenotype on Congo**  
108 **red binding.** We have recently shown that pAB5 regulates the expression of multiple  
109 chromosomally encoded virulence factors in UPAB1 (11). One of the most evident  
110 phenotypes controlled by pAB5 is congo-red binding, which has been associated to the

111 presence of either amyloid fibers, such as curli, or polysaccharides in *Escherichia coli* and  
112 *A. baumannii* species (ref). pAB5 encodes at least six putative transcriptional regulators  
113 (table S1). Among these, there are two TetR regulators, TetR1 and TetR2, virtually identical  
114 to the ones encoded in plasmid pAB3. These two TetR regulators inhibit the assembly of  
115 the type VI secretion system (T6SS) machinery, which is employed by multiple  
116 *Acinetobacter* strains to compete with other bacteria (9,10). pAB5 carries one additional  
117 regulator of unknown function, belonging to the TetR family, TetR3. In addition, pAB5  
118 encodes the global regulator H-NS (histone-like nucleoid structuring). H-NS-like proteins  
119 have been shown to be implicated in the facilitation of chromosome evolution through their  
120 ability to silence transcription, allowing integration of horizontally transferred genes into  
121 bacterial chromosomes (12). Finally, orthologues of other regulators, such as FrmR, a  
122 putative metal/formaldehyde-sensitive transcriptional repressor, and ArsR, a putative  
123 repressor belonging to the arsenic-sensitive family transcriptional regulators are also  
124 encoded in pAB5. To investigate if any of these regulators' controls Congo red binding, we  
125 cloned them individually in the pVRL2 expression vector (13). The constructs were  
126 transformed into UPAB1p-, and the different strains were plated on Congo red plates. As  
127 previously reported, UPAB1 displayed a reduced Congo-red binding (white colonies)  
128 compared to UPAB1p- (red colonies), which correlated with the quantification of Congo red  
129 binding (fig 1A and B). From the six regulators expressed in UPAB1p-, only H-NS changed  
130 the color of the colonies and diminished congo-red binding (fig 1A and B). All other strains  
131 expressing the remaining five regulators behaved as UPAB1p-, exhibiting similar levels of  
132 Congo red binding. Finally, UPAB1 $\Delta$ *h-ns*, a strain carrying pAB5 without *h-ns*, showed  
133 comparable levels of Congo-red binding to UPAB1p- (fig 1C and D). These results

134 demonstrate that H-NS is solely responsible for the pAB5-dependent repression of Congo-  
135 red binding.

136 **Plasmid-encoded H-NS inhibits PNAG production.** It has been proposed that in some *A.*  
137 *baumannii* strains, Congo-red binding is linked to PNAG production (14). To examine if pAB5  
138 inhibits PNAG production, we used a specific antibody to check for the presence or absence  
139 of PNAG. In correlation to congo red phenotypes, UPAB1 and UPAB1p- expressing *h-ns* (p-  
140 */h-ns*) showed drastically reduced levels of PNAG production while UPAB1p-, UPAB1p-  
141 harboring the empty vector (p-*/vec*) and UPAB1 $\Delta$ *h-ns* strains show similar level of PNAG  
142 production (fig 2A). The differences observed on the levels of PNAG production were not  
143 related to differences on cells loaded to the membrane (fig 2B). None of the other putative  
144 transcriptional regulators from pAB5, altered PNAG-production (fig S1). The locus  
145 containing the *pgaABCD* genes has been shown to be responsible for PNAG production in  
146 the clinical isolate *A. baumannii* S1 (14). UPAB1 harbors a similar gene cluster containing  
147 four genes *pgaABCD* (fig 3A). The *pgaA-D* cluster encodes for the poly-beta-1,6 N-acetyl-  
148 D-glucosamine export porin PgaA; the poly-beta-1,6-N-acetyl-D-glucosamine N-  
149 deacetylase PgaB, the poly-beta-1,6 N-acetyl-D-glucosamine synthase PgaC, and the poly-  
150 beta-1,6-N-acetyl-D-glucosamine biosynthesis protein PgaD (15). These proteins have an  
151 identity ranging from 23 to 55 % to the PNAG cluster in *E. coli* and *Yersinia pestis*. Our  
152 recent transcriptomic data showed that this locus is repressed by pAB5 (11). By RT-PCR,  
153 we show that expression of *pgaABC* was repressed by H-NS (fig 3B). Furthermore, the *pgaA*  
154 mutant or the whole *pgaA-D* mutant abolished Congo red binding (fig 4A and S2) and PNAG  
155 production (fig 4 B,C). These phenotypes were recovered in the complemented strains,  
156 demonstrating that *pgaA-D* is responsible for PNAG production in UPAB1. Together, these

157 results show that H-NS downregulates the *pgaA-D* cluster with the concomitant repression  
158 in PNAG production.

159 **H-NS regulates the expression of a previously unidentified “curli-like” cluster.** Congo-

160 red binding has been routinely employed to monitor Curli amyloid production in *E. coli*. In

161 this bacterium, curli synthesis involves two operons, *csgBAC* and *csgDEFG*. These operons

162 are responsible for curli fiber polymerization, stability, transport and assembly (16-18).

163 Particularly, CsgG forms an oligomeric transport complex and is essential for curli assembly.

164 Although curli formation has not been reported in *Acinetobacter* species, a bioinformatic

165 analysis revealed that a CsgG ortholog (D1G37\_12595) is contained within a gene cluster

166 that also comprises two additional genes, D1G37\_12600 (“Ab12600”) and D1G37\_12605

167 (“Ab12605”), both encoding putative lipoproteins (fig 5A). Our previous transcriptomic and

168 proteomic analysis indicated that these genes are also downregulated by pAB5 (11). We

169 validated these data by RT-PCR and determined that the transcription of *csgG* and Ab12600

170 is repressed ~10 fold by pAB5 or a vector expressing *h-ns* (fig 5B), indicating that, besides

171 PNAG, H-NS also represses the *csgG* curli-like cluster in UPAB1.

172 **Disruption of CsgG decreases PNAG production, Cup pili formation and biofilm.** To

173 explore the role of the CsgG-containing operon in UPAB1, we deleted the *csgG* and 12600

174 genes in the strains expressing high levels of *csgG*, i.e., UPAB1p- and UPAB1 $\Delta$ *h-ns*.

175 Surprisingly, *csgG* and 12600 mutant strains showed low levels of Congo-red binding and

176 reduced PNAG production, similar to the *pgaA-D* and *pgaA* mutants, (fig 4A, B and S2). The

177 complementation of the two mutants rescued both phenotypes. To further explore the role

178 of the Curli-like cluster, we analyzed these cells via SEM and TEM. SEM images showed

179 that UPAB1p- cells were coated with a thick layer of extracellular matrix material (fig 6). The



180 *csgG* mutant displayed drastically reduced attachment to the coverslip and, except for some  
181 fibers, lacked most of the extracellular matrix (fig 6). This phenotype was partially  
182 complemented by expressing the CsgG gene *in trans*. (fig 6). For comparative purposes,  
183 we also examined the  $\Delta pgaA-D$  mutant strain. The  $\Delta CsgG$  and  $\Delta pgaA-D$  strains exhibited  
184 similar phenotypes, although the reduced binding to the coverslips was less pronounced in  
185 the  $\Delta pgaA-D$  strain (fig 6). These phenotypes are not due to growth defects (fig S4), and  
186 they correlate with the lower PNAG production in the *csgG* mutant. Our TEM analysis  
187 showed that CsgG, but not PgaA-D deletion, results in an almost total abrogation of CUP  
188 pili formation (fig 7). CUP pili levels were restored in the complemented cells. Western-blot  
189 analysis confirmed that deletion of CsgG abrogated CUP pili expression (Fig S4). Moreover,  
190 this analysis confirmed that CUP pili is repressed by pAB5, although this repression was  
191 independent of H-NS (Fig S4). The changes in the extracellular matrix were also reflected  
192 in the levels of biofilm formation, as the *pgaA-D* and *csgG* mutants produced less biofilm  
193 compared to wild-type bacteria (Fig 8). The reduction of biofilm formation was restored in  
194 the complemented strains (fig S5). Moreover, cells carrying pAB5, but not pAB5 $\Delta h-ns$ ,  
195 displayed lower levels of biofilm formation. Together these experiments demonstrate that  
196 deletion of CsgG results in reduced production of PNAG and CUP pili, with the subsequent  
197 reduction in biofilm formation.

198 **The *csgG* cluster is widely distributed in Gram-negative bacteria.** Our results show that  
199 CsgG is implicated in different phenotypes in UPAB1. A bioinformatics analysis revealed  
200 that this cluster is widespread among Gram-negative bacteria (fig 9). In some bacterial  
201 species, such as *Neisseria meningitidis* or *Vibrio harveyi*, the locus contains additional  
202 genes predicted to be co-transcribed. Recently, the crystal structure of GNA1162 from *N.*

203 *meningitidis*, a homologue to D1G37\_12605, has been solved (21). GNA 1162 exhibited  
204 structural similarities to TolB, and authors speculate that this protein may act as an  
205 accessory protein to an unidentified transport machinery. Despite, this cluster is present in  
206 a very large number of bacteria, its roles remain unknown and further studies are needed to  
207 identify the target of this cluster and its importance in virulence.

208

## 209 **DISCUSSION**

210 We have previously shown that the *Acinetobacter* LCPs play a key role in the dissemination  
211 of MDR and influences the pathogenesis of this bacterium by controlling the expression of  
212 chromosomally-encoded virulence factors. In this study, we show that pAB5, the LCP from  
213 UPAB1, encodes a H-NS transcriptional regulator that inhibits biofilm formation by  
214 repressing the expression of PNAG. Additionally, we found that pAB5-encoded HN-S  
215 represses the expression of a three-gene cluster that contains a homolog of CsgG, a protein  
216 involved in curli assembly. We found that disruption of CsgG dramatically reduced PNAG  
217 production, CUP pili assembly, and consequently, biofilm formation. Bioinformatic analysis  
218 revealed that the “curli like cluster” is widely distributed among Gram-negative bacteria  
219 without any attributed function.

220 The cross-regulatory pathways between plasmids and the bacterial chromosomes have  
221 been recently reviewed (22). Plasmid-encoded transcriptional regulators can modulate the  
222 expression of genes involved in many different processes, including motility, glycogen  
223 synthesis, adherence and quorum sensing, among others (22). H-NS-like proteins are  
224 encoded in plasmids in *Shigella flexneri* and *Salmonella enterica*. However, in these  
225 species, plasmid-encoded H-NS appear to regulate only genes horizontally acquired which

226 maintain the energetic cost of their expression at a lower level, without affecting expression  
227 of other chromosomal genes (22). We have previously shown that repressing  
228 chromosomally encoded T6SS enable the dissemination of LCPs via conjugation (10). By  
229 downregulating PNAG, CsgG, and CUP pili, pAB5 represses biofilm formation in UPAB1. In  
230 monospecies biofilms, bacteria are surrounded by their kin, which limits the dissemination  
231 capacity of the plasmids. It is tempting to speculate that promoting the planktonic lifestyle of  
232 the host increases the chances of dissemination of pAB5 to other bacterial hosts. However,  
233 further work is required to understand the physiological implication of this process.

234 Our discovery that pAB5-encoded H-NS represses biofilm formation in UPAB1 is preceded  
235 by similar findings in *E. coli* and *Salmonella* (23-28). However, in these species H-NS is  
236 encoded in the chromosome. In *E. coli* and *Salmonella*, the CsgG protein is part of a multi  
237 protein complex responsible for curli fiber formation, and H-NS regulates its expression by  
238 repressing *csgD*, a key regulator for curli synthesis. In these species, H-NS is part of an  
239 intricate regulatory network that integrates diverse environmental conditions and ultimately  
240 controls curli biogenesis. CsgG is part of a predicted operon together with two putative  
241 lipoproteins of unknown function that is widely distributed in Gram-negative bacteria.  
242 *Acinetobacter* spp does not encode a complete curli biosynthetic machinery and curli fibers  
243 have not been reported. In *Caulobacter*, the CsgG ortholog, named HfaB is part of a cluster  
244 containing HfaABD, where HfaA has properties of amyloid proteins (CsgA). The HfaABD  
245 complex is critical for anchoring holdfast, a polysaccharide made of N-acetyl-d-glucosamine  
246 (NAG), and other sugars to the *Caulobacter* cell surface. It has been proposed that holdfast  
247 is attached to HfaA by an unknown mechanism (29-31). We hypothesize that a similar  
248 function anchoring PNAG to the cell surface is accomplished by a multimeric complex

249 formed by CsgG and the two lipoproteins in the operon. Further work is necessary to  
250 determine the exact role of this gene cluster in the assembly of the extracellular matrix in  
251 these species.

252

## 253 **MATERIALS AND METHODS**

254 **Bacterial strains and growth conditions.** Bacterial strains, plasmids, and oligonucleotides  
255 used in this study are listed in Supplementary information. Unless otherwise noted, all  
256 strains were grown in Lysogeny broth (LB) broth at 37C with shaking (200 rpm). For strain  
257 constructions, we used gentamicin (15 or 20  $\mu\text{g ml}^{-1}$ ), kanamycin (7.5 or 50  $\mu\text{g ml}^{-1}$ ), zeocin  
258 (50  $\mu\text{g ml}^{-1}$  with low salt LB), hygromycin (300  $\mu\text{g ml}^{-1}$ ).

259 **Construction of *A. baumannii* mutants and complement strains, and pVRL2**  
260 **constructs.** Plasmids, and oligonucleotides used in this study are listed in Supplementary  
261 Tables S2 and S3, respectively. The constructs for generating deletions in *h-ns*, *pgaA-D*,  
262 *pgaA*, *csgG* and D1G37\_126000 were made by substitution of the gene by an antibiotic  
263 (kanamycin or zeocin) cassette as described previously (32). Selection of mutants was  
264 carried out using the proper antibiotic. To make unmarked strains, electrocompetent  
265 mutants were transformed with pAT03 to remove the FRT-flanked antibiotic cassette.  
266 Transformants were plated on LB-agar plates containing 2 mM IPTG + hygromycin to  
267 express FLP recombinase. All strains were verified by antibiotic resistance, PCR  
268 amplification and gene sequencing. To generate genetic complementation, genes of interest  
269 were cloned into the pUC18T-miniTn7T-Gm (zeo) vector and introduced to UPAB1p- strains  
270 via four-parental mating methods as described previously (33,34). Briefly, 100  $\mu\text{l}$  of

271 stationary cultures was normalized to an OD600 of 2.0 of each recipient strain, and  
272 HB101(pRK2013), EC100D(pTNS2), and EC100D containing the pUC18T-miniTn7T  
273 constructs were added to 600  $\mu$ l of warm LB. Each suspension was washed twice by  
274 centrifugation at 7000g, followed by resuspension of the bacterial pellet in 1 ml of warm LB.  
275 On the final wash, the bacterial pellet was resuspended in 25  $\mu$ l of LB, and the suspension  
276 was spotted on a prewarmed LB agar plate (or low-salt LB agar plate) and incubated  
277 overnight at 37°C. The bacteria were scraped from the plate, resuspended in 1 ml of LB,  
278 vortexed, and serial dilutions were plated on L agar plates supplemented with  
279 chloramphenicol to select against *E. coli* strains and gentamicin or zeocin to select for *A.*  
280 *baumannii* strains that had received the mini-Tn7 constructs. Correct insertion of the  
281 constructs was verified by PCR amplification and sequencing. The expression of different  
282 regulators of the pAB5 plasmid as *p/h-ns*, *p/tetR1* and others were made using the pVRL2  
283 vector (13). Constructs were generated by restriction enzyme cloning using the HindIII and  
284 PstI sites. All the constructs were introduced to UPAB1p- strains by electroporation and  
285 transformants were selected on gentamicin.

286 **Congo red plate and congo red binding quantification.** The red versus white color of  
287 cells was investigated using YESCA agar media (35) supplemented with 50  $\mu$ g/ml Congo  
288 red. To quantify the congo red binding for bacteria prestained on the YESCA congo red  
289 plates (36). Cells were recovered from YESCA congo red plates after incubation at 26C for  
290 48 hours. Cells were washed twice in 50 mM potassium phosphate buffer by centrifugation  
291 at 16,000 x g for 2 min and resuspended in 1 ml 50 mM potassium phosphate buffer, and  
292 the OD was adjusted to 1.100  $\mu$ l of each sample were loaded onto a 96-well opaque plate,  
293 the fluorescence of congo red was measured using the plate reader (BioTek microplate

294 spectrophotometer) with an excitation wavelength at 485nm and emission at 612 nm. The  
295 buffer was used as the blank.

296 **Reverse transcription-PCR.** Cells were taken from LB plates after an overnight growth at  
297 26°C and normalized to OD 1 and treated with RNA protect. RNA purification was prepared  
298 using the Quick RNA fungal/bacterial miniprep (Zymo Research) by following the  
299 manufacturer's instructions with some modification in the DNA digestion step as follows.  
300 Contaminating DNA was removed using the Turbo DNA-free kit (Invitrogen) by following the  
301 manufacturer's instructions. For reverse transcription (RT)-PCR, cDNA was prepared from  
302 1 µg RNA using a high-capacity RNA-to-cDNA kit (Applied Biosystems), according to the  
303 manufacturer's protocol. Real-time quantitative PCR (qPCR) was performed using Power  
304 SYBR green PCR master mix reagents (Applied Biosystems) on a ViiA7 real-time PCR  
305 system (Applied Biosystems), following the manufacturer's suggested protocol. In all cases  
306 a no-template control was run with no detectable transcripts.

307 **Biofilm formation.** Cells were grown overnight in 5 ml of LB broth (or YESCA), then cultures  
308 were diluted to an OD<sub>600</sub> of 0.01 in LB broth (or YESCA). Cultures were deposited in 96-  
309 well plates and incubated at 37 °C for 8 or 24 hours without shaking. Cultures were removed  
310 to read the absorbance at 600nm. Then, plates were washed three times with water, stained  
311 with 0.1% Crystal Violet (w/v) and quantified at 550 nm after solubilization with 30% acetic  
312 acid.

313 **Detection of PNAG production.** Immunoblotting to detect PNAG production was  
314 performed as described previously (14) with some modification. Cells grown overnight on  
315 LB, then diluted to an OD of 1 and spotted in to YESCA plate and incubated for 48 hours at  
316 26 °C. Cells were scraped from plate and normalized to an OD of 1, then pelleted and

317 resuspended in 300  $\mu$ l of 0.5 M EDTA (pH 8.0). Cells were incubated for 5 min at 98 °C, and  
318 centrifuged at 9000 x g for 5 min. After centrifugation, supernatants were diluted 1:3 in Tris-  
319 buffered saline (TBS) and incubated with 100  $\mu$ l of proteinase K (20 mg/ml) for 60 min at 65  
320 °C then for 30 min at 80 °C (to inactivate the protease). The preparations were serially  
321 diluted in TBS, and 5  $\mu$ l were spotted on nitrocellulose membrane and let the membrane dry  
322 completely. Next, membrane was blocked and incubated with an anti-PNAG antibody (kind  
323 gift of Dr. Gerald B. Pier, Harvard Medical School), and an anti-human IgG (IRDye 800 CW)  
324 antibody (LI-COR Biosciences, Lincoln, NE) and visualized with an Odyssey CLx imaging  
325 system (LI-COR Biosciences). Following, membrane was incubated with anti-UPAB1  
326 primary antibody (Ref) followed by an incubation with anti-rabbit IgG (IRDye 800 CW)  
327 antibody (LI-COR Biosciences, Lincoln, NE).

328 **Scanning Electron Microscopy.** Overnight cultures on YESCA media were diluted in  
329 YESCA + 4% DMSO (37) to an OD600 of 0.02 in 24 well-plate containing glass coverslips  
330 and incubated at 26°C for 24 hours with shaking. Then, the media was removed, and the 24  
331 well-plate was washed with 0.15 M cacodylate buffer. Cells were fixed overnight at room  
332 temperature on a shaker using the fixative solution (2.5% glutaraldehyde, 2%  
333 paraformaldehyde and 0.2% tannic acid in 0.15M cacodylate buffer pH 7.4 with 2mM  
334 calcium chloride). Post fixation, coverslips were rinsed in 0.15 M cacodylate buffer 3 times  
335 for 10 minutes each followed by a secondary fixation in 1% OsO<sub>4</sub> in 0.15 M cacodylate  
336 buffer for 45 minutes in the dark. The coverslips were then rinsed 3 times in ultrapure water  
337 for 10 minutes each and dehydrated in a graded ethanol series (10%, 30%, 50%, 70%, 90%,  
338 100% x2) for 10 minutes each step. Once dehydrated, the samples were loaded into a  
339 critical point drier (Leica EM CPD 300, Vienna, Austria) which was set to perform 12 CO<sub>2</sub>



340 exchanges at the slowest speed. Once dried, coverslips were mounted on aluminum stubs  
341 with carbon adhesive tabs and coated with 10 nm of carbon and 6 nm of iridium (Leica ACE  
342 600, Vienna, Austria). SEM images were acquired on a FE-SEM (Zeiss Merlin, Oberkochen,  
343 Germany) at 1.5 kV and 0.1 nA.

344 **Transmission electron microscopy and cup pili detection.** Overnight cultures on  
345 YESCA media were diluted in YESCA+ 4% DMSO (37) to an OD<sub>600</sub> of 0.02 and incubated  
346 at 26°C for 48 hours with shaking. Next cultures were washed with PBS and used for TEM  
347 and western blot. For negative staining and analysis by transmission electron microscopy,  
348 Bacterial samples were fixed with 1% glutaraldehyde (Ted Pella Inc., Redding CA) and  
349 allowed to absorb onto freshly glow discharged formvar/carbon-coated copper grids for 10  
350 min. Grids were then washed in dH<sub>2</sub>O and stained with 1% aqueous uranyl acetate (Ted  
351 Pella Inc.) for 1 min. Excess liquid was gently wicked off and grids were allowed to air  
352 dry. Samples were viewed on a JEOL 1200EX transmission electron microscope (JEOL  
353 USA, Peabody, MA) equipped with an AMT 8-megapixel digital camera (Advanced  
354 Microscopy Techniques, Woburn, MA). For cup pili detection, cells were resuspended in  
355 Laemmli buffer to a final OD of 10. Samples were loaded onto 15% SDS-PAGE gel for  
356 separation, transferred to a nitro-cellulose membrane and probed with polyclonal rabbit anti  
357 CupA (1:1000) and monoclonal mouse anti-RNA polymerase (1:3000, Biolegend, San 397  
358 Diego, CA). Western blots were then probed with IRDye-conjugated anti-mouse and anti-  
359 rabbit secondary antibodies (both at 1:15,000, LI-COR Biosciences, Lincoln, NE) and  
360 visualized with an Odyssey CLx imaging system (LI-COR Biosciences).

361 **Generation of polyclonal rabbit sera against CupA.** The UPAB1 gene *cupA* was cloned  
362 into pET28a+ with a 10-histidine tag using primers SB cupA bamh1 F and SB cupA hind3



363 R, creating pET28-CupA10His, and electroporated into *E. coli* DH5 $\alpha$ . pET28-CupA10His  
364 was confirmed by sequencing. *E. coli* Rosetta 2 cells were used for CupA purification. 1 liter  
365 of LB was inoculated from an overnight culture of Rosetta 2/pET28-CupA10His at an OD<sub>600</sub>  
366 of 0.05. Culture grown to an OD<sub>600</sub> of ~ 0.5 before induction with 1 mM isopropyl 1-thio- $\beta$ -d-  
367 galactopyranoside (IPTG). The cultures were grown for an additional 4 hours. Cells were  
368 harvested at 12000 x g for 20 min. Cells were washed with cold PBS and resuspended in  
369 binding buffer supplemented with protease inhibitor (300 mM NaCl, 10 mM imidazole, 30  
370 mM Tris-HCl, pH 8.0). Cells were lysed with a cell disruptor using three rounds at 35 kp.s.i  
371 (Constant System Ltd., Kennesaw, GA). Cell lysates were centrifuged at 20000g (or 11000  
372 rpm) for 20 min to collect inclusion bodies. Pellet was resuspended in binding buffer and  
373 centrifuged as described before twice. Then pellet was resuspended in binding buffer  
374 containing urea and incubated for 3 hours at 4°C with continuous stirring (6 M urea, 300 mM  
375 NaCl, 10 mM imidazole, 30 mM Tris-HCl, pH 8.0). Then, lysates were centrifuged at 35000  
376 x g for 20 min and supernatant was filtered using 0.45  $\mu$ m filter. Next, Cell lysates were  
377 passed over a nickel-NTA agarose column (Gold Bio, St. Louis, MO) equilibrated with 10  
378 column volumes of binding buffer. The load fraction is the total cell lysate. The flow-through  
379 was collected as what passed through the column and did not bind the nickel-NTA resin.  
380 The column was washed first with 15 column volumes of washing buffer (5M urea, 20 mM  
381 imidazole, 300 mM NaCl, 30 mM Tris-HCl, pH 8.0) and second with 10 column volumes of  
382 washing buffer (4M urea, 20 mM imidazole, 300 mM NaCl, 30 mM Tris-HCl, pH 8.0).  
383 Proteins were eluted using elution buffer (2M urea, 250 mM imidazole, 300 mM NaCl, 30  
384 mM Tris-HCl, pH 8.0). Elution fractions were analyzed by SDS-PAGE analysis and  
385 Coomassie staining. The polyacrylamide gel band corresponding to CupA-His was sent to

386 Antibody Research Corporation (St. Louis, MO) for peptide extraction and development of  
387 rabbit-derived polyclonal antibodies.

388 **Growth assays.** Bacteria were cultured overnight in YESCA liquid media at 26 °C under  
389 shaking conditions. Cultures were washed with PBS and diluted to an OD<sub>600</sub> of 0.01 in 150  
390 µL of YESCA liquid media in 96 well plates and incubated at 26 °C under shaking conditions.  
391 OD<sub>600</sub> values were measured every 30 min for 16 hours via a BioTek microplate  
392 spectrophotometer. Three separate experiments were performed with four wells per  
393 experiment for each strain.

394

## 395 **ACKNOWLEDGEMENTS**

396 We acknowledge the assistance of Dr. Wandy Beatty at the Molecular Microbiology  
397 department Imaging Facility at Washington University School of Medicine in transmission  
398 electron microscopy studies, Dr. Sanja Sviben and Dr. James Fitzpatrick at the Washington  
399 University Center for Cellular Imaging (WUCCI) in scanning electron microscopy studies,  
400 which is supported by Washington University School of Medicine, The Children's Discovery  
401 Institute of University and St. Louis Children's Hospital (CDI-CORE-2015-505 and CDI-  
402 CORE-2019-813), the Foundation for Barnes-Jewish Hospital (3770). We thank Dr. Gerald  
403 B. Pier for sharing the anti-PNAG antibody.

404 This work was supported by grants from the National Institute of Allergy and Infectious  
405 Diseases (grants R01AI144120 and R01AI125363).

406

407

408 • **FIGURE & LEGENDS**

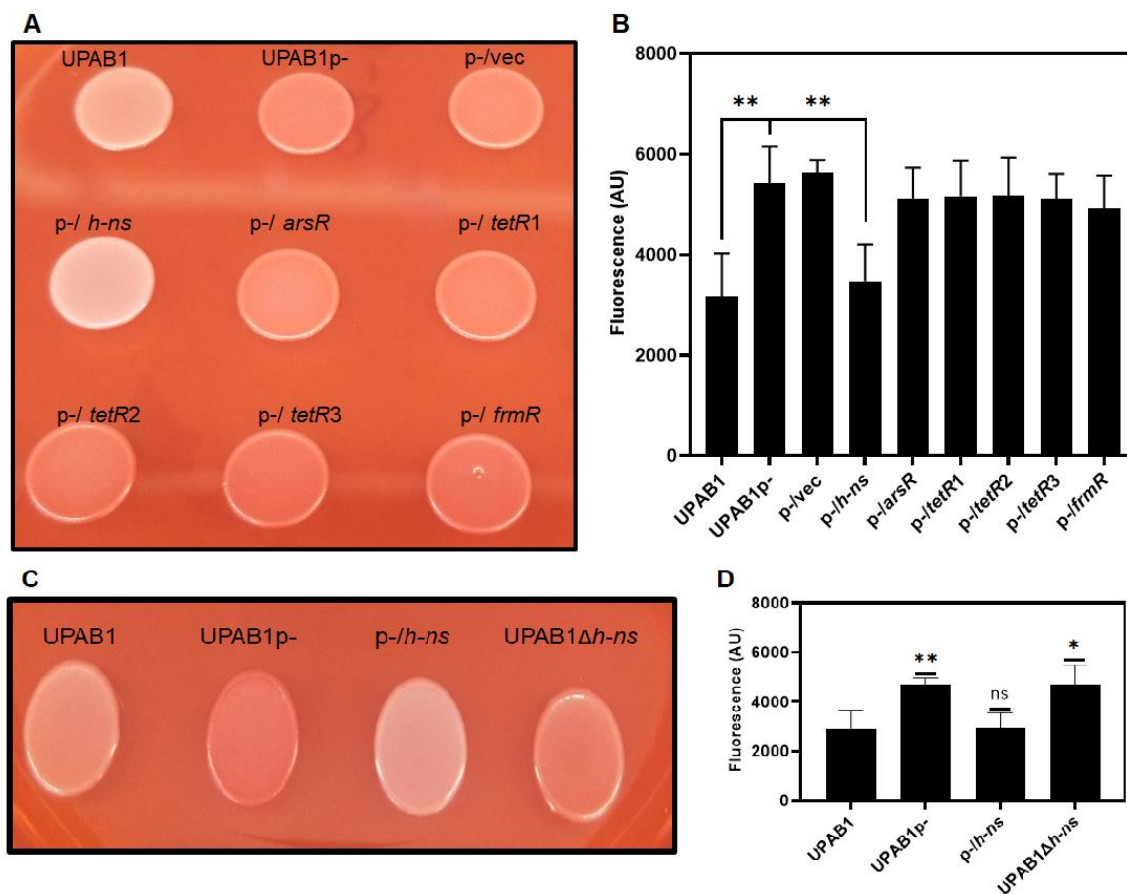

409  
410 **Figure 1. H-NS inhibits Congo red binding.** (A & C) UPAB1 and derivatives strain  
411 spotted in YESCA Congo-red agar plates. (B & D) Quantification of Congo-red binding  
412 (excitation wavelength at 485 nm and the emission at 612nm). The values represent  
413 the means and standard deviations from five (B) and four (D) independent  
414 experiments. *t* test was performed by comparison with wild type (\*\*  $p \leq 0.003$ , \*  $p \leq 0.03$ ).

415

416

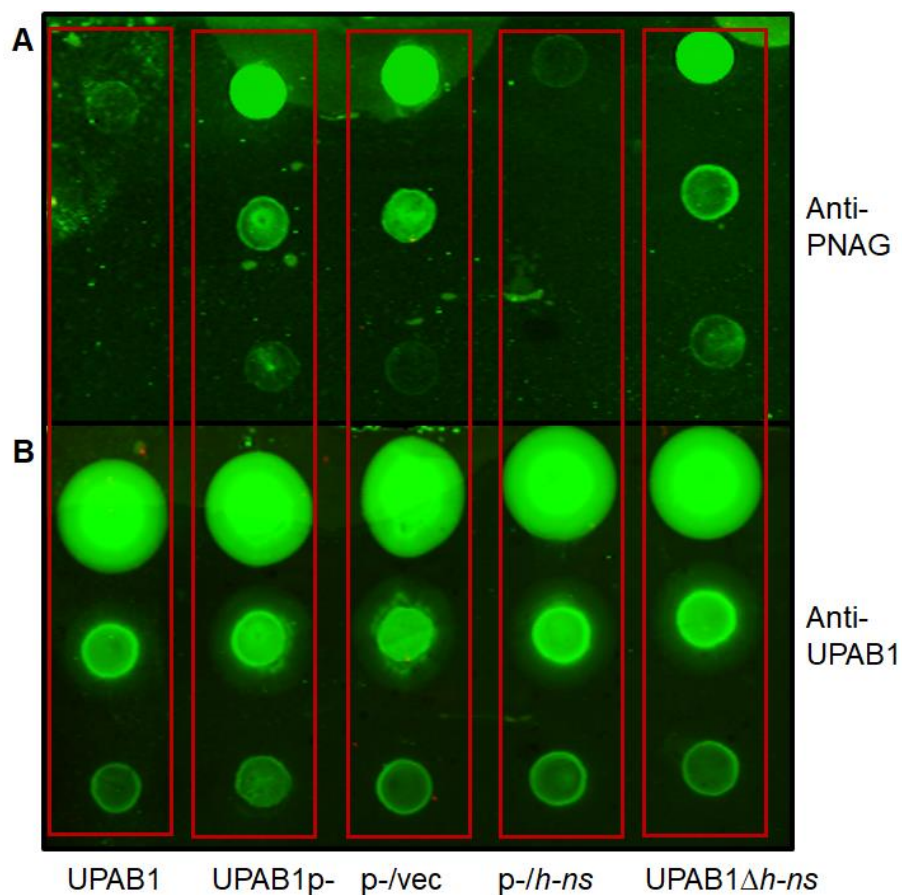

417

418

419

420

421

422

423

424

425

**Figure 2. H-NS reduce PNAG production.** Immunoblotting using antibodies anti-PNAG (A) and antibodies anti-UPAB1 as a loading control (B). Cells were taken from an overnight LB-agar plate at 26 °C and adjusted to an OD of 1. After treatment, 5 µl of a serial dilution were spotted on nitrocellulose membrane.

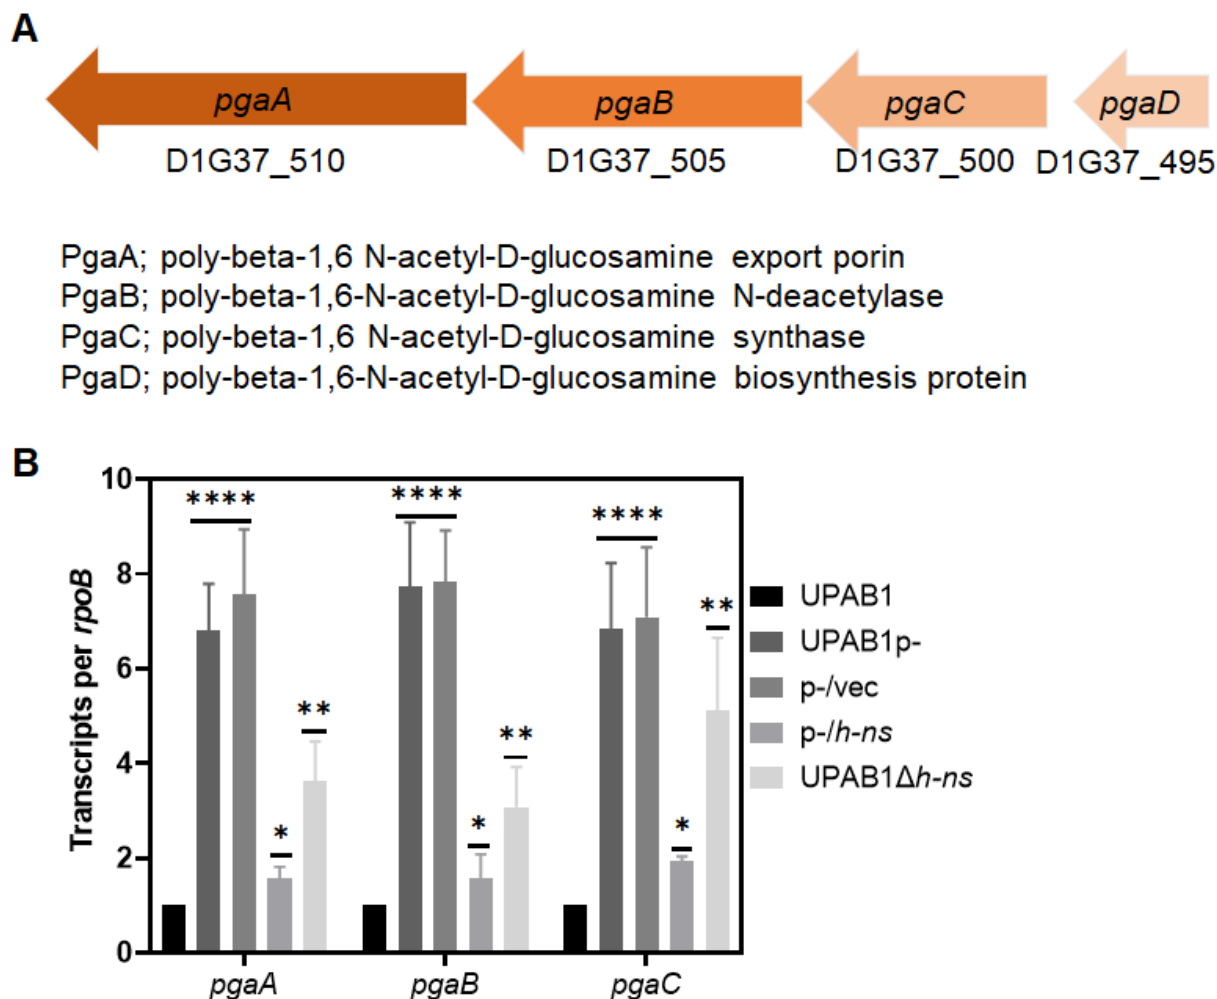

426  
427 **Figure 3. H-NS reduce the expression of *pnag* cluster.** (A) Illustration of *pgaA-D* genes  
428 cluster. (B) *pgaABC* expression. Transcripts were measured from cells growing on LB  
429 plates at 26°C and adjusted to an OD of 1. Results are shown as *rpoB*-adjusted transcript  
430 values. The values represent the means and standard deviations from four independent  
431 experiments. T-test (\*\*\*\*  $p \leq 0.0001$ , \*\*  $p \leq 0.005$ , \*  $p \leq 0.05$ ).

432

433

434

435

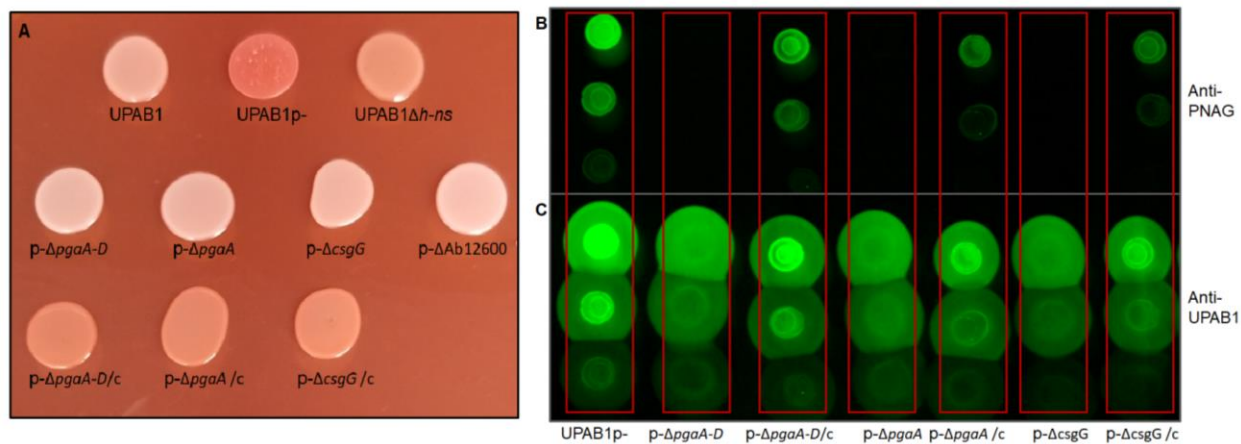

436  
437 **Figure 4. *pgaA-D* and curli-like clusters are involved in PNAG production. (A)**  
438 phenotype on YESCA-Congo red agar plates of UPAB1p-, derivative mutant and  
439 complemented strains. PNAG production was measured using antibodies anti-PNAG  
440 (B) and antibodies anti-UPAB1 as loading control (C).

441  
442  
443  
444  
445  
446  
447  
448  
449  
450  
451  
452  
453  
454  
455  
456  
457

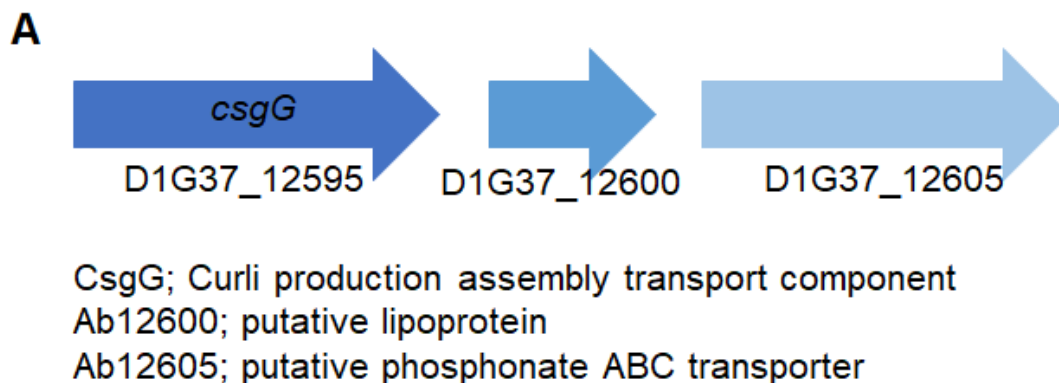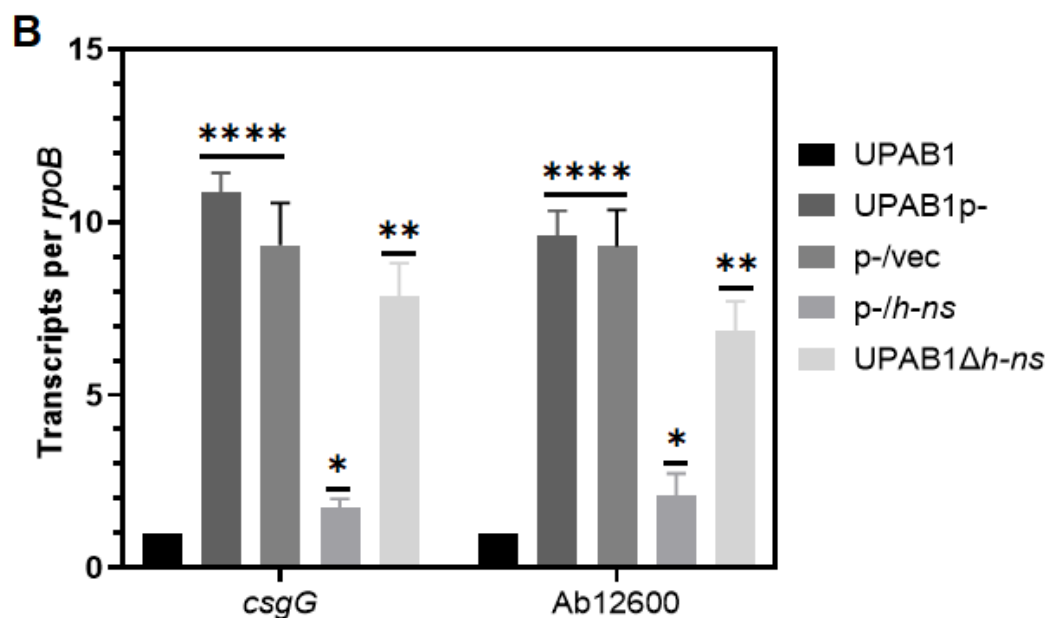

458  
459 **Figure 5. H-NS reduce the expression of curli-like cluster.** (A) Illustration of *csgG*  
460 cluster. (B) *csgG* and Ab12600 expression. Transcripts were measured from cells  
461 growing on LB plates at 26°C and adjusted to an OD of 1. Results are shown as *rpoB*-  
462 adjusted transcript values. Values represent means and standard deviations from four  
463 independent experiments. T-test (\*\*\*\*  $p \leq 0.0001$ , \*\*  $p \leq 0.005$ , \*  $p \leq 0.05$ ).

464  
465  
466  
467  
468



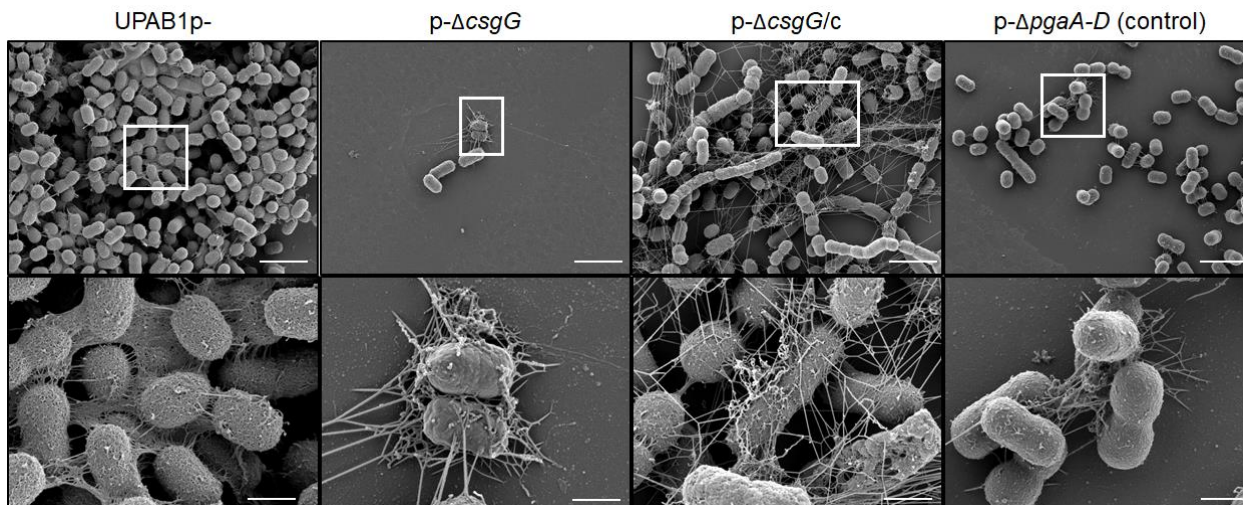

469  
470

471 **Figure 6. CsgG and PNAG are involved in extracellular matrix production.** SEM  
472 analysis of UPAB1p-, p-ΔcsgG, p-ΔcsgG/c, and p-ΔpgaA-D (as a control). Cells grown  
473 in YESCA media with 4% DMSO in 24-well plate with glass coverslips. After overnight  
474 growth, glass coverslips were removed, washed (150 mM cacodylate buffer with 2mM  
475 CaCl<sub>2</sub>), fixed (2.5% glutaraldehyde, 2% paraformaldehyde, and 0.2% tannic acid in  
476 150 mM cacodylate buffer (pH 7.4) with 2mM CaCl<sub>2</sub>) and treated for observation. The  
477 bottom panel is a magnification of the white square in the top panel. Scale bars are 1  
478 μm for top panel and 200 nm for bottom panel.

479

480  
481  
482  
483  
484  
485  
486  
487  
488  
489  
490  
491



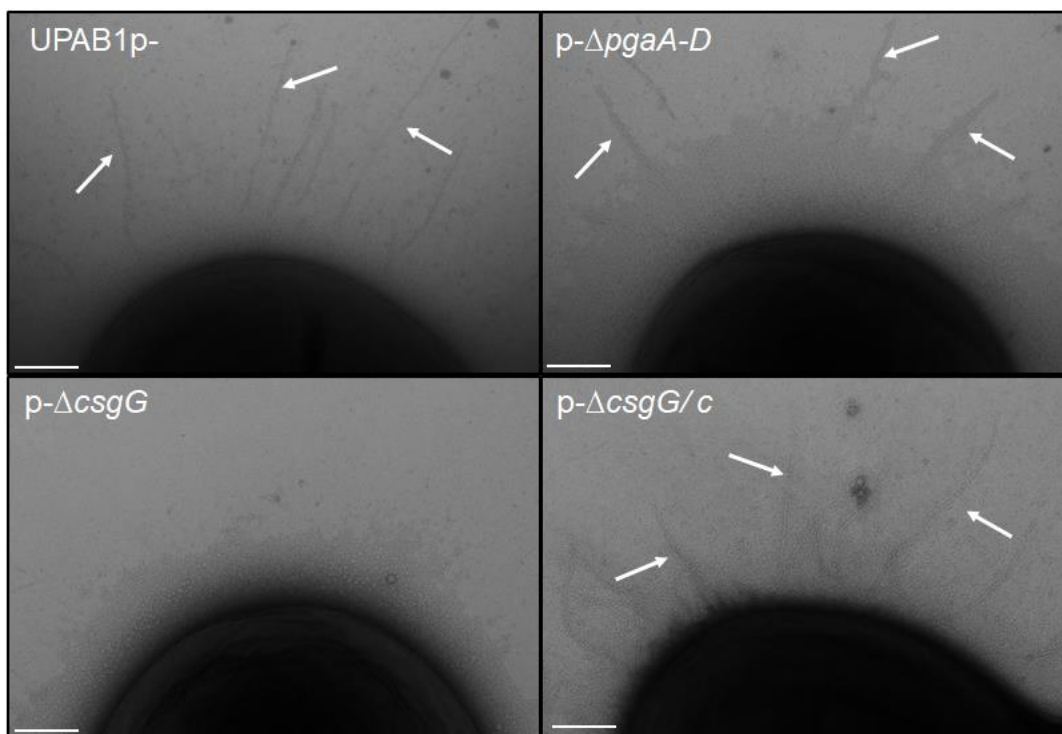

492  
493  
494 **Figure 7. CsgG is involved in CUP pili formation.** Transmission electron microscopic  
495 images showing CUP pili. The pili structures were absent in p-ΔcsgG strain and  
496 restored in the complemented strain (p- ΔcsgG/c). Cells grow for 48 hours in YESCA  
497 media supplemented with 4% DMSO with shaking at 26 °C. Scale bar 100 nm

498  
499  
500  
501  
502  
503  
504  
505  
506  
507  
508  
509

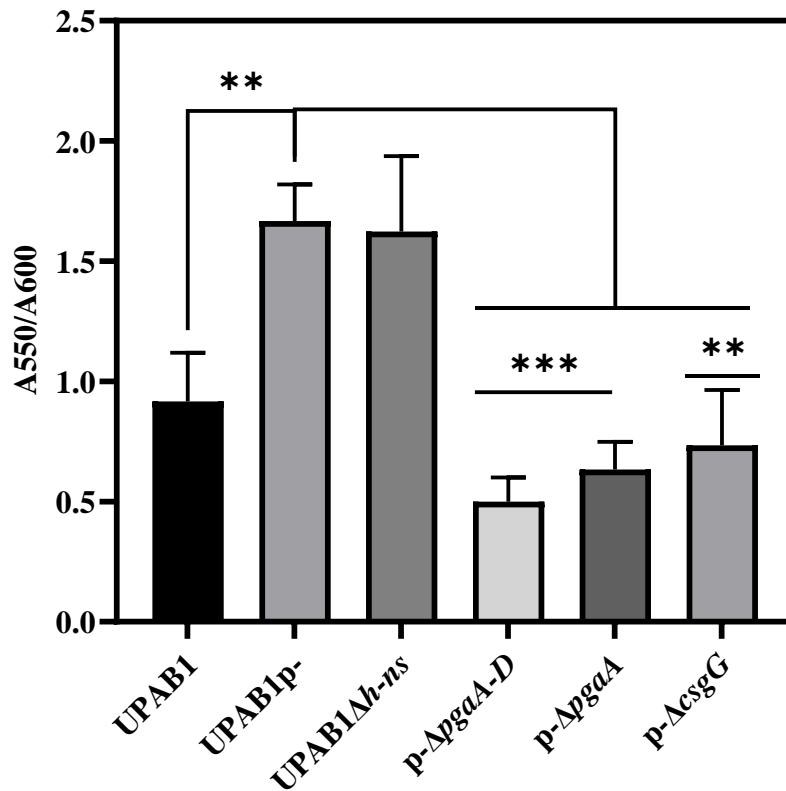

510  
511 **Figure 8. pAB5 reduce biofilm formation.** Cells were grown for 8 hours on LB broth  
512 at 37°C in static conditions. Biofilm formation was measured by crystal violet and  
513 normalized to the growth. The values represent the mean and standard deviations from  
514 three independent experiments. T-test was performed by comparison with the pAB5-  
515 strain (\*\* $p \leq 0.0005$ , \*\*  $p \leq 0.005$ )

516  
517  
518  
519  
520  
521  
522  
523

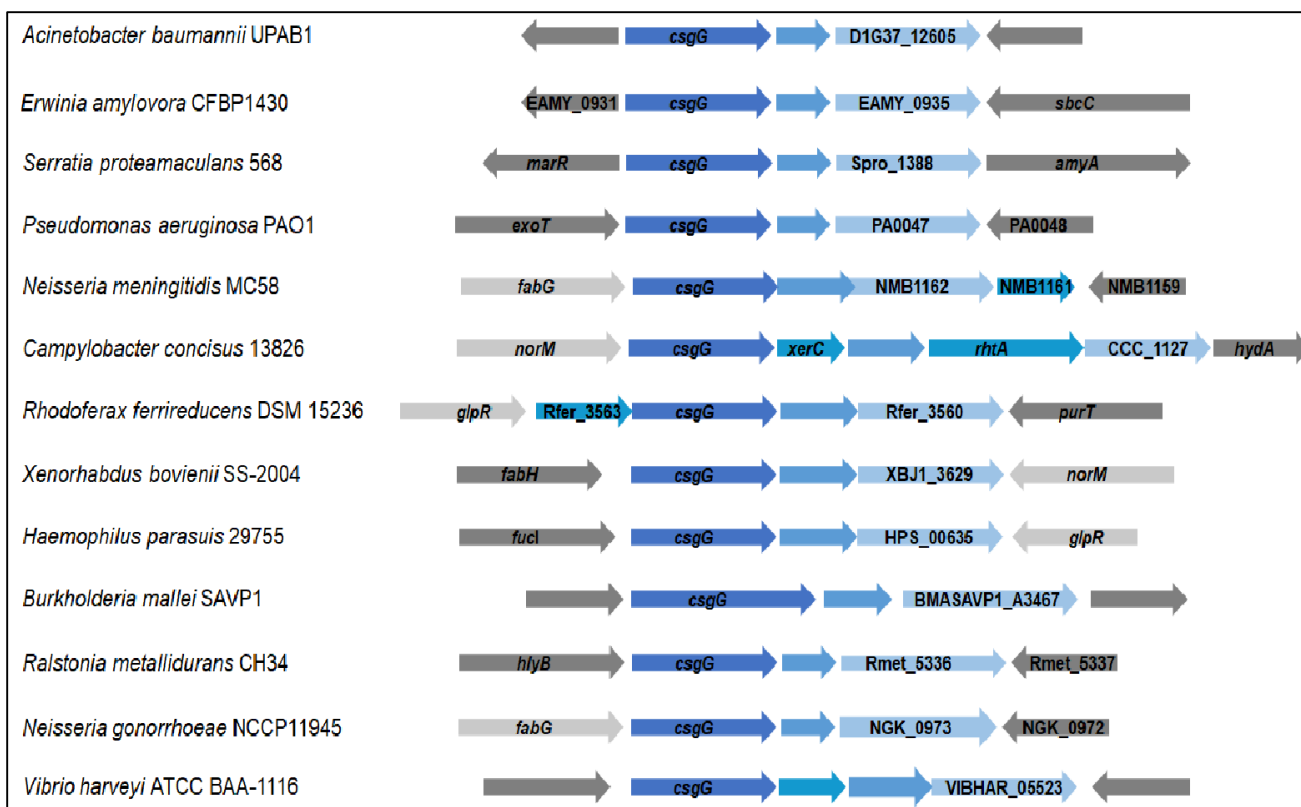

524  
525

526 **Figure 9. Distribution of *csgG* cluster in Gram- negative bacteria. The *csgG* cluster**  
527 **is indicated in blue.**

528

529

530

531

532

533

534

535

536

537

538 • **REFERENCES**

- 539 1. Giammanco A, Calà C, Fasciana T, Dowzicky MJ. 2017. Global Assessment of the  
540 Activity of Tigecycline against Multidrug-Resistant Gram-Negative Pathogens between  
541 2004 and 2014 as Part of the Tigecycline Evaluation and Surveillance Trial. *mSphere*  
542 2.
- 543 2. Rolain JM, Diene SM, Kempf M, Gimenez G, Robert C, Raoult D. 2013. Real-time  
544 sequencing to decipher the molecular mechanism of resistance of a clinical pan-drug-  
545 resistant *Acinetobacter baumannii* isolate from Marseille, France. *Antimicrobial Agents*  
546 *and Chemotherapy* 57:592–596.
- 547 3. Blackwell GA, Hamidian M, Hall RM. 2016. IncM Plasmid R1215 Is the Source of  
548 Chromosomally Located Regions Containing Multiple Antibiotic Resistance Genes in  
549 the Globally Disseminated *Acinetobacter baumannii* GC1 and GC2 Clones. *mSphere*  
550 1.
- 551 4. Wright MS, Iovleva A, Jacobs MR, Bonomo RA, Adams MD. 2016. Genome  
552 dynamics of multidrug-resistant *Acinetobacter baumannii* during infection and  
553 treatment. *Genome Medicine* 8.
- 554 5. Norman A, Hansen LH, Sørensen SJ. 2009. Conjugative plasmids: Vessels of the  
555 communal gene pool. *Philosophical Transactions of the Royal Society B: Biological*  
556 *Sciences*. Royal Society.
- 557 6. Luque A, Paytubi S, Sánchez-Montejo J, Gibert M, Balsalobre C, Madrid C. 2019.  
558 Crosstalk between bacterial conjugation and motility is mediated by plasmid-borne  
559 regulators. *Environmental Microbiology Reports* 11:708–717.
- 560 7. Smalla K, Jechalke S, Top EM. 2015. Plasmid Detection, Characterization, and  
561 Ecology. *Microbiology Spectrum* 3.
- 562 8. Orlek A, Stoesser N, Anjum MF, Doumith M, Ellington MJ, Peto T, Crook D,  
563 Woodford N, Sarah Walker A, Phan H, Sheppard AE. 2017. Plasmid classification in an  
564 era of whole-genome sequencing: Application in studies of antibiotic resistance  
565 epidemiology. *Frontiers in Microbiology*. Frontiers Research Foundation.
- 566 9. Weber BS, Ly PM, Irwin JN, Pukatzki S, Feldman MF. 2015. A multidrug resistance  
567 plasmid contains the molecular switch for type VI secretion in *Acinetobacter baumannii*.  
568 *Proceedings of the National Academy of Sciences of the United States of America*  
569 112:9442–9447.
- 570 10. di Venanzio G, Moon KH, Weber BS, Lopez J, Ly PM, Potter RF, Dantas G,  
571 Feldman MF. 2019. Multidrug-resistant plasmids repress chromosomally encoded  
572 T6SS to enable their dissemination. *Proceedings of the National Academy of Sciences*  
573 *of the United States of America* 116:1378–1383.
- 574 11. di Venanzio G, Flores-Mireles AL, Calix JJ, Haurat MF, Scott NE, Palmer LD,  
575 Potter RF, Hibbing ME, Friedman L, Wang B, Dantas G, Skaar EP, Hultgren SJ,  
576 Feldman MF. 2019. Urinary tract colonization is enhanced by a plasmid that regulates

- 577 uropathogenic *Acinetobacter baumannii* chromosomal genes. *Nature Communications*  
578 10.
- 579 12. Doyle M, Fookes M, Ivens A, Mangan MW, Wain J, Dorman CJ. 2007. An H-NS-  
580 like Stealth Protein Aids Horizontal DNA Transmission in Bacteria. *Science* 315:251.
- 581 13. Lucidi M, Runci F, Rampioni G, Frangipani E, Leoni L, Visca P. 2018. New shuttle  
582 vectors for gene cloning and expression in multidrug-resistant *Acinetobacter* species.  
583 *Antimicrobial Agents and Chemotherapy* 62.
- 584 14. Choi AHK, Slamti L, Avci FY, Pier GB, Maira-Litrán T. 2009. The pgaABCD locus of  
585 *Acinetobacter baumannii* encodes the production of poly- $\beta$ -1-6-N-acetylglucosamine,  
586 which is critical for biofilm formation. *Journal of Bacteriology* 191:5953–5963.
- 587 15. Whitney JC, Howell PL. 2013. Synthase-dependent exopolysaccharide secretion in  
588 Gram-negative bacteria. *Trends in Microbiology*.
- 589 16. Barnhart MM, Chapman MR. 2006. Curli biogenesis and function. *Annual Review*  
590 *of Microbiology*.
- 591 17. Evans ML, Chapman MR. 2014. Curli biogenesis: Order out of disorder. *Biochimica*  
592 *et Biophysica Acta - Molecular Cell Research* 1843:1551–1558.
- 593 18. van Gerven N, Klein RD, Hultgren SJ, Remaut H. 2015. Bacterial amyloid  
594 formation: Structural insights into curli biogenesis. *Trends in Microbiology*. Elsevier Ltd.
- 595 19. Vella P, Rudraraju RS, Lundbäck T, Axelsson H, Almqvist H, Vallin M, Schneider  
596 G, Schnell R. 2021. A FabG inhibitor targeting an allosteric binding site inhibits several  
597 orthologs from Gram-negative ESKAPE pathogens. *Bioorganic and Medicinal*  
598 *Chemistry* 30.
- 599 20. Ge B, McDermott PF, White DG, Meng J. 2005. Role of efflux pumps and  
600 topoisomerase mutations in fluoroquinolone resistance in *Campylobacter jejuni* and  
601 *Campylobacter coli*. *Antimicrobial Agents and Chemotherapy* 49:3347–3354.
- 602 21. Cai X, Lu J, Wu Z, Yang C, Xu H, Lin Z, Shen Y. 2013. Structure of *Neisseria*  
603 *meningitidis* lipoprotein GNA1162. *Acta Crystallographica Section F: Structural Biology*  
604 *and Crystallization Communications* 69:362–368.
- 605 22. Vial L, Hommais F. 2020. Plasmid-chromosome cross-talks. *Environmental*  
606 *Microbiology*. Blackwell Publishing Ltd.
- 607 23. Römling U, Römling R, Bian Z, Hammar M, Sierralta WD, Normark S. 1998. Curli  
608 Fibers Are Highly Conserved between *Salmonella typhimurium* and *Escherichia coli*  
609 with Respect to Operon Structure and Regulation *JOURNAL OF BACTERIOLOGY*.
- 610 24. Sigma S-dependent growth-phase induction of the csgBA promoter in *Escherichia*  
611 *coli* can be achieved in vivo by sigma 70 in the absence of the nucleoid-associated  
612 protein H-NS.
- 613 25. Gerstel U, Park C, Römling U. 2003. Complex regulation of csgD promoter activity  
614 by global regulatory proteins. *Molecular Microbiology* 49:639–654.

- 615 26. Olsen A, Arnqvist A, Hammar M, Sukupotvi<sup>^</sup> S, Normark' S. 1993. The RpoS  
616 Sigma factor relieves H-NS-mediated transcriptional repression of *csgA*, the subunit  
617 gene of fibronectin-binding curli in *Escherichia coli* *Molecular Microbiology*.  
618 27. Desai SK, Winardhi RS, Periasamy S, Dykas MM, Jie Y, Kenney LJ. 2016. The  
619 horizontally-acquired response regulator SsrB drives a *Salmonella* lifestyle switch by  
620 relieving biofilm silencing <https://doi.org/10.7554/eLife.10747.001>.  
621 28. Desai SK, Kenney LJ. 2019. Switching Lifestyles Is an in vivo Adaptive Strategy of  
622 Bacterial Pathogens. *Frontiers in Cellular and Infection Microbiology*. Frontiers Media  
623 S.A.  
624 29. Hardy GG, Allen RC, Toh E, Long M, Brown PJB, Cole-Tobian JL, Brun Y v. 2010.  
625 A localized multimeric anchor attaches the *Caulobacter holdfast* to the cell pole.  
626 *Molecular Microbiology* 76:409–427.  
627 30. Hardy GG, Toh E, Berne C, Brun Y v. 2018. Mutations in sugar-nucleotide  
628 synthesis genes restore holdfast polysaccharide anchoring to *Caulobacter crescentus*  
629 holdfast anchor mutants. *Journal of Bacteriology* 200.  
630 31. Sulkowski NI, Hardy GG, Brun Y v, Bharat TAM. 2019. A Multiprotein Complex  
631 Anchors Adhesive Holdfast at the Outer Membrane of *Caulobacter crescentus*.  
632 [jeb.asm.org](http://jeb.asm.org) 1 *Journal of Bacteriology* 201:112–131.  
633 32. Tucker AT, Nowicki EM, Boll JM, Knauf GA, Burdis NC, Stephen Trent M, Davies  
634 BW. 2014. Defining gene-phenotype relationships in *Acinetobacter baumannii* through  
635 one-step chromosomal gene inactivation. *mBio* 5:1–9.  
636 33. Kumar A, Dalton C, Cortez-Cordova J, Schweizer HP. 2010. Mini-Tn7 vectors as  
637 genetic tools for single copy gene cloning in *Acinetobacter baumannii*. *Journal of*  
638 *Microbiological Methods* 82:296–300.  
639 34. Ducas-Mowchun K, Malaka P, Silva D, Crisostomo L, Fernando DM, Chao T-C,  
640 Pelka P, Schweizer HP, Kumar A. 2019. Next Generation of Tn7-Based Single-Copy  
641 Insertion Elements for Use in Multi- and Pan-Drug-Resistant Strains of *Acinetobacter*  
642 *baumannii*.  
643 35. Nenninger AA, Robinson LS, Hultgren SJ. 2008. Localized and efficient curli  
644 nucleation requires the chaperone-like amyloid assembly protein CsgF.  
645 36. Zhou Y, Blanco LP, Smith DR, Chapman MR. 2012. Bacterial amyloids. *Methods in*  
646 *Molecular Biology* 849:303–320.  
647 37. Lim JY, May JM, Cegelski L. 2012. Dimethyl sulfoxide and ethanol elicit increased  
648 amyloid biogenesis and amyloid-integrated biofilm formation in *Escherichia coli*.  
649 *Applied and Environmental Microbiology* 78:3369–3378.

650  
651  
652

653 • **SUPPLEMENTAL MATERIAL**



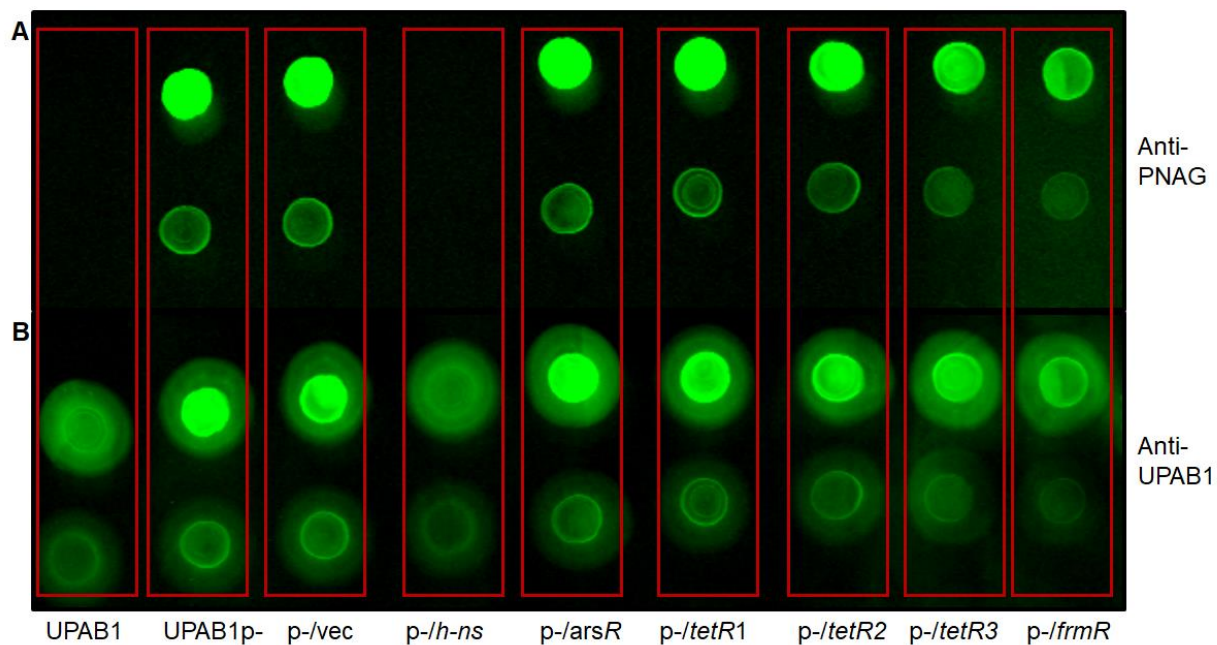

654

655 **Figure S1. H-NS reduce PNAG production.** UPAB1, UPAB1p-, and UPAB1p- empty

656 vector (p-/vec) or the vector expressing the pAB5 regulators. Immunoblots using

657 antibodies anti-PNAG (A) and antibodies anti-UPAB1 as loading control (B). Cells were

658 taken from overnight LB-agar plates incubated at 26 °C and adjusted to OD 1.

659

660

661

662

663

664

665

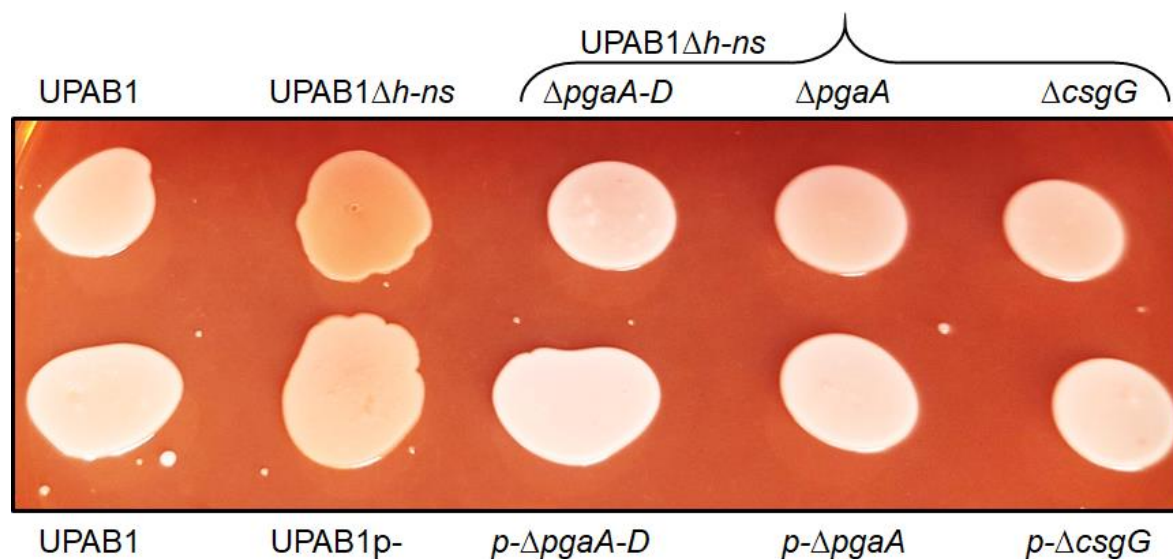

666

667

668 **Figure S2.** PgaA-D and CsgG like clusters are involved in Congo-red binding. Deletions of

669 pgaA-D, pgaA and csgG were made in UPAB1Δh-ns background (top panel) and UPAB1p-

670 background. Cells were incubated for 48 hours at 26°C on YESCA-Congo-red agar plates.

671

672

673

674

675

676

677

678

679



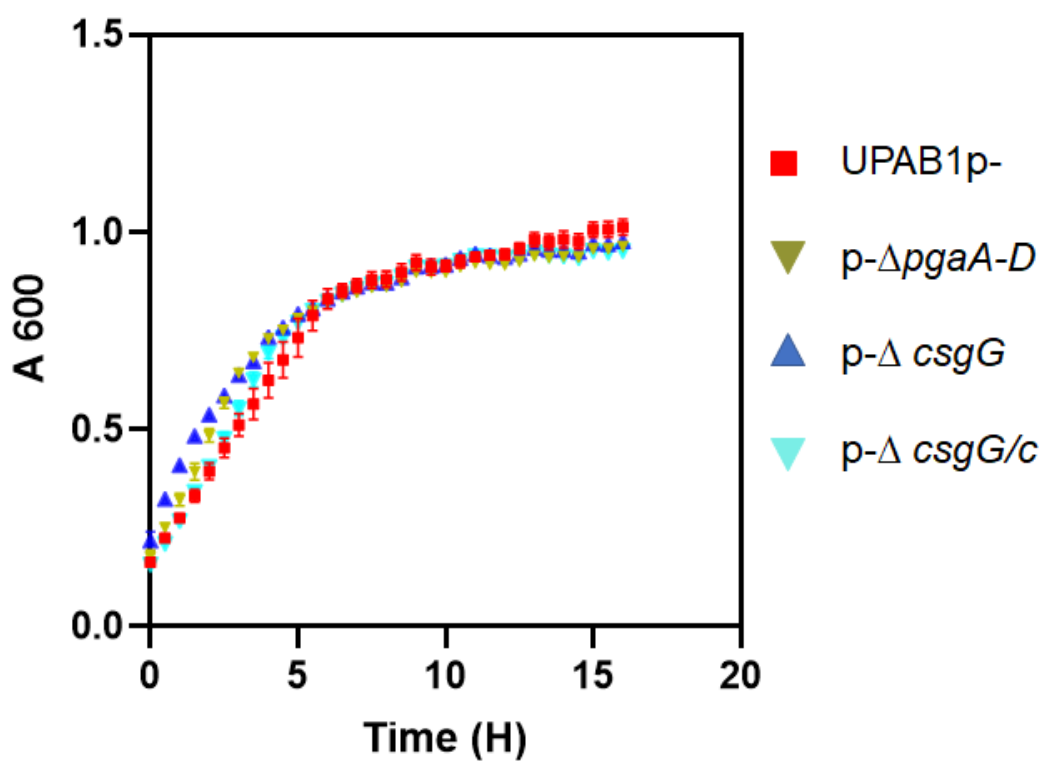

680  
681 **FigureS3.** Growth curves of UPAB1p- and derivative mutant strains in YESCA-DMSO  
682 media, measured by OD600. The graphs represent the mean and standard deviation of  
683 three replicates.

684

685

686

687

688

689

690

691

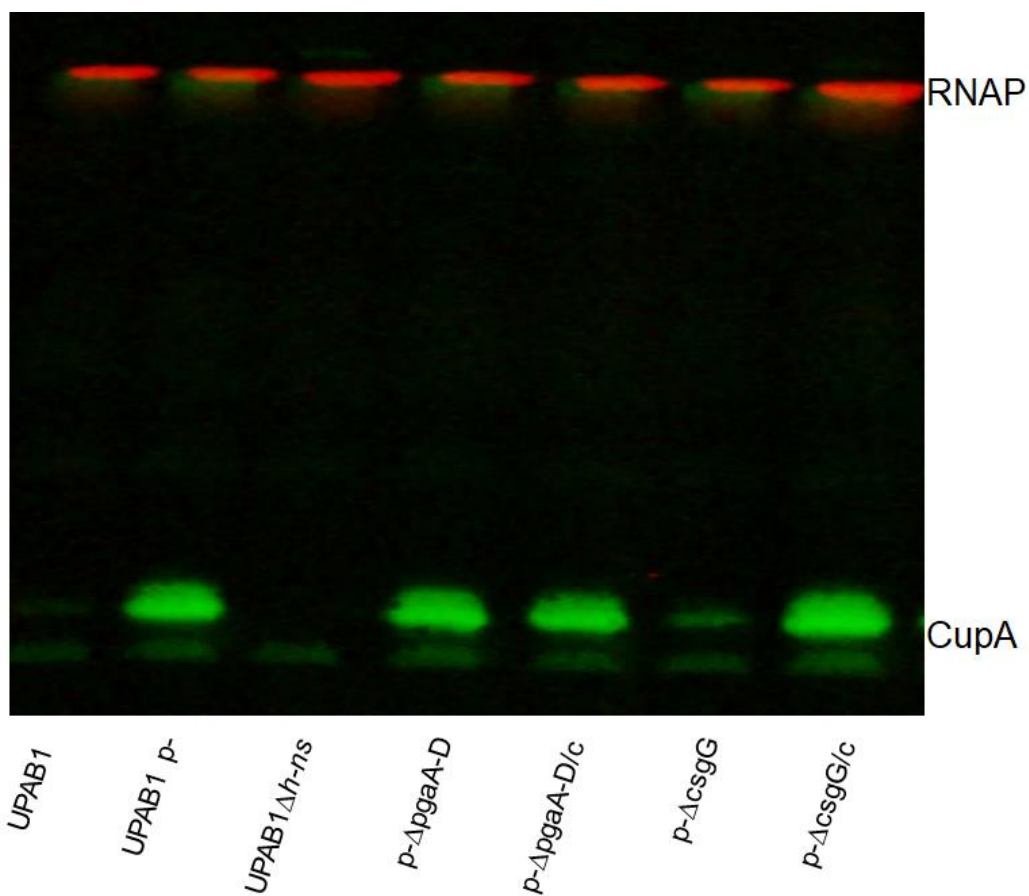

692  
693 **Figure S4.** pAB5 inhibits CUP pili formation. Western blot of OD-normalized whole cell.  
694 Western blot probing for CupA (the Usher protein from Cup 2 pili). RNAP is included as  
695 loading control.

696

697

698

699

700

701

702

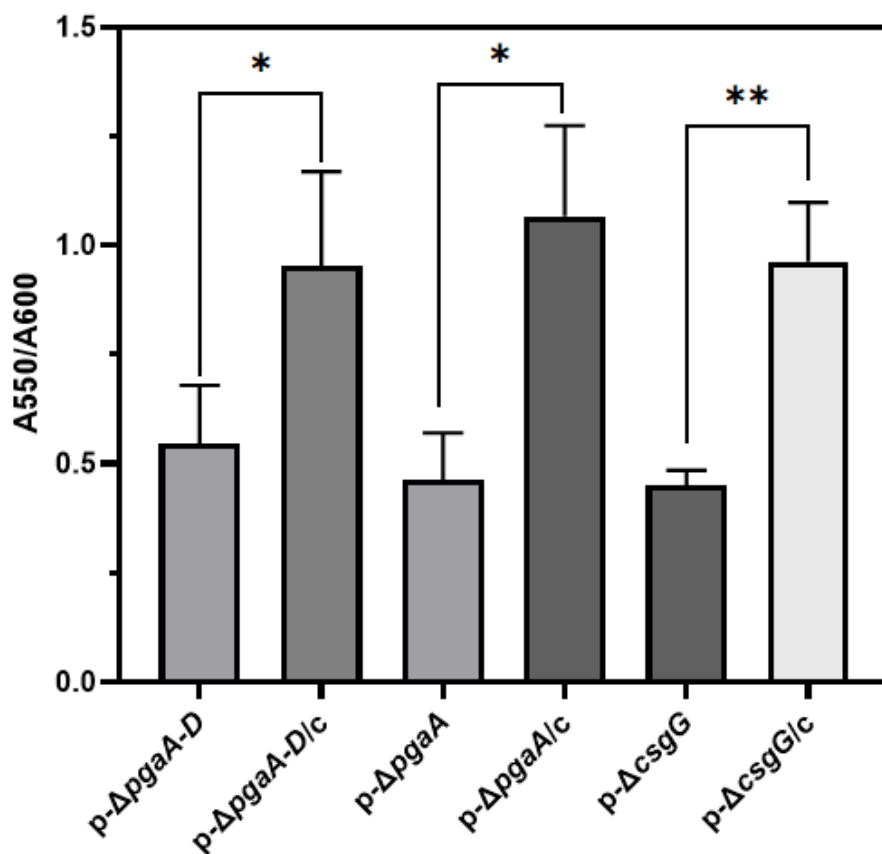

703

704 **Figure S5.** Biofilm formation in UPAB1p- mutants and complemented strains. Cells

705 were grown for 8 hours on LB broth at 37°C under static conditions. Biofilm formation

706 was measured by the crystal violet binding and normalized to the OD600. The values

707 represent the mean and standard deviations from three independent experiments.

708 Statistical analysis by t test was performed by comparison with the pAB5- strain (\*\*

709  $p \leq 0.005$ , \*  $p \leq 0.05$ ).

710

711

712

713

714

715 **Table S1. List of regulators identified in pAB5**

| 716 | Accession number | Description                                | Protein name |
|-----|------------------|--------------------------------------------|--------------|
| 717 | D1G37_RS18580    | H-NS histone family protein                | H-NS         |
| 718 | D1G37_RS18620    | TetR/AcrR family transcriptional regulator | TetR1        |
| 719 | D1G37_RS18650    | TetR/AcrR family transcriptional regulator | TetR2        |
| 720 | D1G37_RS18810    | TetR family transcriptional regulator      | TetR3        |
| 721 | D1G37_RS18815    | ArsR family transcriptional regulator      | ArsR         |
| 722 | D1G37_RS18965    | metal/formaldehyde-sensitive family        | FrmR         |
| 723 |                  | transcriptional regulator                  |              |

724

725

726

727

728

729

730

731

732

733

734

735

736

737

738 **Table S2. Bacterial strains used in this study.**

| 739 | Strain                             | Relevant properties                                | Reference  |
|-----|------------------------------------|----------------------------------------------------|------------|
| 740 | UPAB1                              | MDR Urine isolate with pAB5 plasmid                | (1)        |
| 741 | UPAB1p- (p-)                       | UPAB1 derivative strain without pAB5               | (1)        |
| 742 | UPAB1 $\Delta h$ -ns               | UPAB1 containing an unmarked <i>h</i> -ns deletion | this study |
| 743 | p-/vec                             | UPAB1p- containing the pVRL2 expression vector     | this study |
| 744 | p-/h-ns                            | p- expressing <i>h</i> -ns in pVRL2                | this study |
| 745 | p-/tetR1                           | p- expressing <i>tetR1</i> in pVRL2                | this study |
| 746 | p-/tetR2                           | p- expressing <i>tetR2</i> in pVRL2                | this study |
| 747 | p-/tetR3                           | p- expressing <i>tetR3</i> in pVRL2                | this study |
| 748 | p-/arsR                            | p- expressing <i>arsR</i> in pVRL2                 | this study |
| 749 | p-/frmR                            | p- expressing <i>frmR</i> in pVRL2                 | this study |
| 750 | p- $\Delta pgaA$ -D                | p- containing an unmarked <i>pgaA</i> -D deletion  | this study |
| 751 | p- $\Delta pgaA$                   | p- containing an unmarked <i>pgaA</i> deletion     | this study |
| 752 | p- $\Delta csgG$                   | p- containing an unmarked <i>csgG</i> deletion     | this study |
| 753 | p- $\Delta Ab$ 12600               | p- containing an unmarked D1G37_12600 deletion     | this study |
| 754 | p+ $\Delta h$ -ns $\Delta pgaA$ -D | UPAB1 containing an unmarked <i>h</i> -ns          | this study |
| 755 |                                    | and <i>pgaA</i> -D deletion                        |            |
| 756 | p+ $\Delta h$ -ns $\Delta pgaA$    | UPAB1 containing an unmarked <i>h</i> -ns          | this study |
| 757 |                                    | and <i>pgaA</i> deletion                           |            |
| 758 | p+ $\Delta h$ -ns $\Delta csgG$    | UPAB1 containing an unmarked <i>h</i> -ns          | this study |
| 759 |                                    | and <i>csgG</i> deletion                           |            |
| 760 | p- $\Delta pgaA$ -D/c              | p- $\Delta pgaA$ -D complemented                   | this study |
| 761 | p- $\Delta pgaA$ /c                | p- $\Delta pgaA$ complemented                      | this study |
| 762 | p- $\Delta csgG$ /c                | p- $\Delta csgG$ complemented                      | this study |

763

764

765

766

767 **Table S3. Bacterial plasmids used in this study.**

| 768 | Plasmid                       | Relevant properties                                          | Reference  |
|-----|-------------------------------|--------------------------------------------------------------|------------|
| 769 | pVRL2                         | Expression vector in <i>Acinetobacter</i> ; Gm <sup>r</sup>  | (2)        |
| 770 | pVRL2/ <i>h-ns</i>            | pVRL2 containing <i>h-ns</i>                                 | this study |
| 771 | pVRL2/ <i>tetR1</i>           | pVRL2 containing <i>terR1</i>                                |            |
| 772 | pVRL2/ <i>tetR2</i>           | pVRL2 containing <i>tetR2</i>                                |            |
| 773 | pVRL2/ <i>tetR3</i>           | pVRL2 containing <i>tetR3</i>                                |            |
| 774 | pVRL2/ <i>arsR</i>            | pVRL2 containing <i>arsR</i>                                 |            |
| 775 | pVRL2/ <i>frmR</i>            | pVRL2 containing <i>frmR</i>                                 |            |
| 776 | pAT03                         | pMMB67EH with FLP recombinase Hyg <sup>r</sup>               | (ref)      |
| 777 | pAT04                         | pMMB67EH with RecAb system, Hyg <sup>r</sup>                 | (ref)      |
| 778 | pUC18T-miniTn7T-Gm            | mobilizable mini-Tn7 vector, Gm <sup>r</sup>                 | (ref)      |
| 779 | pUC18T-miniTn7- <i>pgaA-D</i> |                                                              | this study |
| 780 | pUC18T-miniTn7- <i>pgaA</i>   |                                                              | this study |
| 781 | pUC18T-miniTn7- <i>csgG</i>   |                                                              | this study |
| 782 | pTNS2                         | Tn7 transposase- expressing helper plasmid, Amp <sup>r</sup> | (ref)      |
| 783 | pRK2013                       | RK2 derivative, Km <sup>r</sup> ; self-transmissible         | (ref)      |
| 784 | pET28 a+                      |                                                              | Novagen    |
| 785 | pET28 a-CupA                  |                                                              | this study |

786

787

788
